# Supplementary material for: Electronic influence of ligand substituents on the rate of polymerization of ε-caprolactone by single-site aluminium alkoxide catalysts
Source: Royal Society of Chemistry journal article supplement (doi:10.1039/b303760f), 2003-01-01
Supplement: b303760f.pdf [file b303760f.pdf]

Supporting Information

For

**Electronic Influence of Ligand Substituents on the Rate of  
Polymerization of  $\epsilon$ -Caprolactone by Single-Site Aluminum  
Alkoxide Catalysts**

Luis M. Alcazar-Roman, Brendan O'Keefe, Marc A. Hillmyer\* and William B. Tolman\*

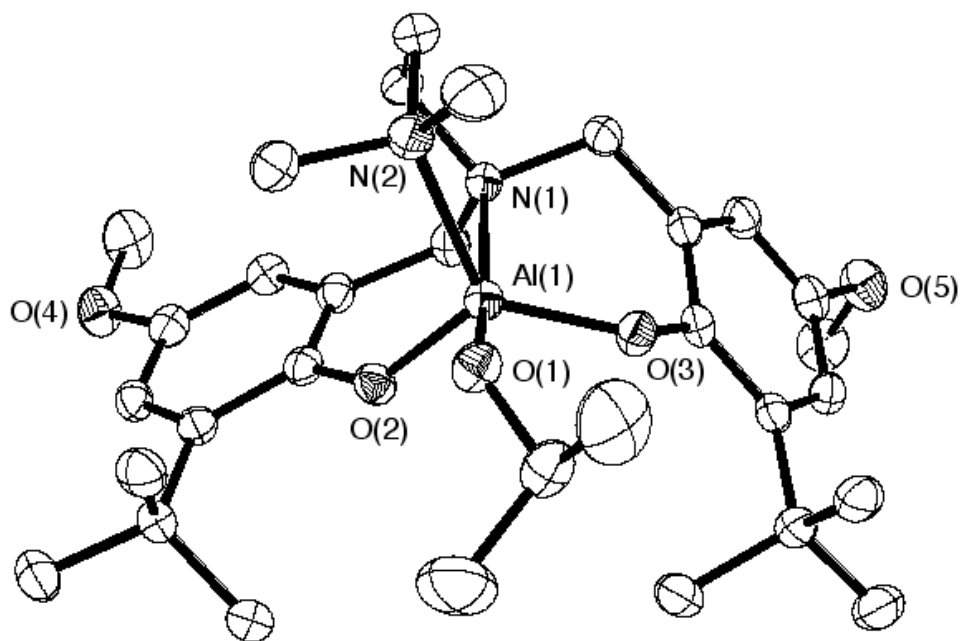

**Fig. S1** X-ray structure of **3b**, with all nonhydrogen atoms shown as 50% thermal ellipsoids and hydrogen atoms omitted for clarity.

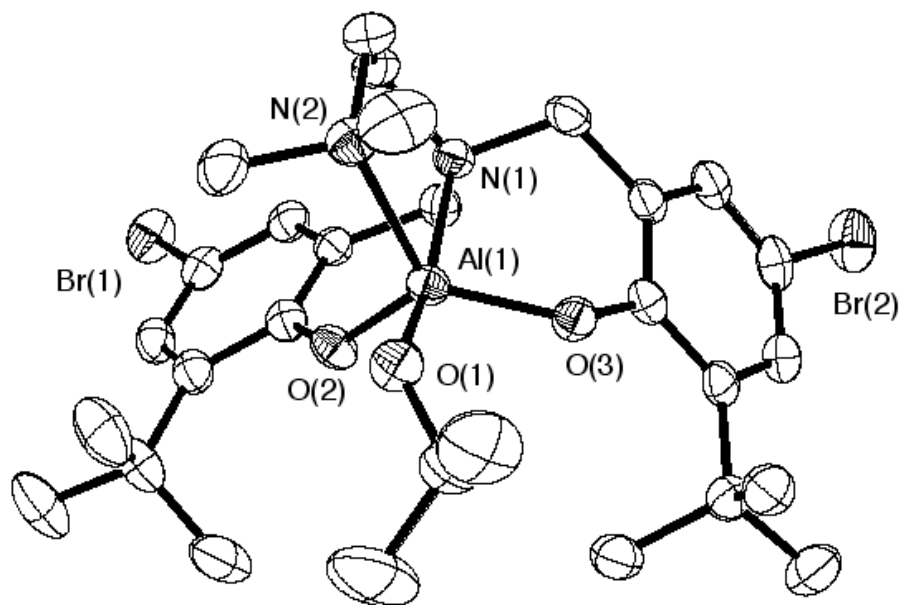

**Fig. S2** X-ray structure of **3c**, with all nonhydrogen atoms shown as 50% thermal ellipsoids and hydrogen atoms omitted for clarity.

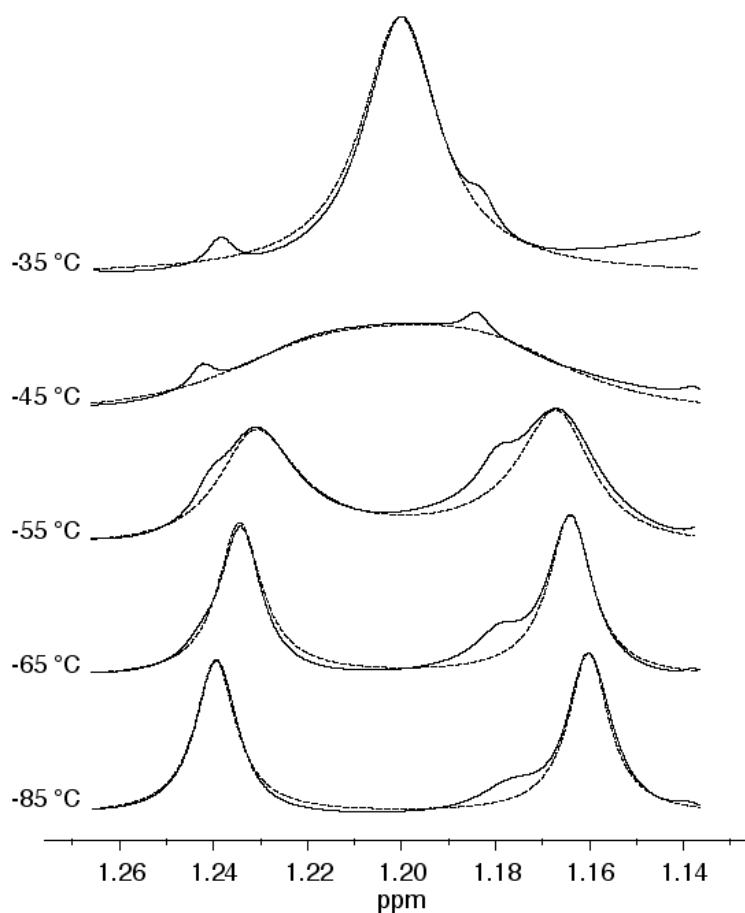

**Fig. S3** Line-shape analysis of Variable Temperature  $^1\text{H}$  NMR spectra of **3a** showing the coalescence of two tert-butyl peaks. Experimental data (—), simulation (---).

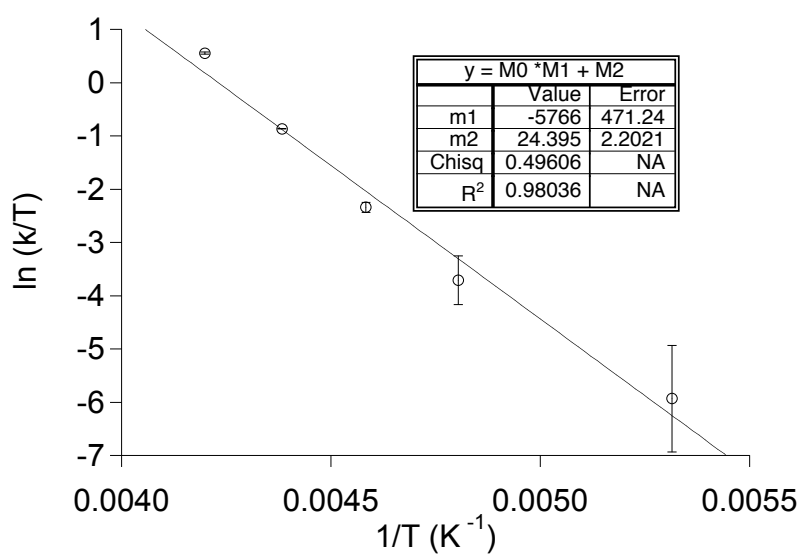

**Fig. S4** Eyring plot for the temperature-dependent fluxional process for **3a**.

**Table S1.** Selected bond lengths (Å) and angles (deg) for (<sup>t</sup>-Bu,OMeBPBA)Al(O-*i*-Pr) (**3b**)

---

|                 |            |                 |            |
|-----------------|------------|-----------------|------------|
| Al(1)-O(1)      | 1.7441(11) | Al(1)-O(2)      | 1.7597(11) |
| Al(1)-O(3)      | 1.7694(11) | Al(1)-N(1)      | 2.1083(13) |
| Al(1)-N(2)      | 2.1818(13) |                 |            |
| O(1)-Al(1)-O(2) | 100.84(5)  | O(1)-Al(1)-O(3) | 98.51(5)   |
| O(2)-Al(1)-O(3) | 117.33(5)  | O(1)-Al(1)-N(2) | 85.68(5)   |
| O(3)-Al(1)-N(2) | 127.83(5)  | O(2)-Al(1)-N(2) | 112.67(5)  |
| O(1)-Al(1)-N(1) | 164.37(5)  | O(3)-Al(1)-N(1) | 88.33(5)   |
| O(2)-Al(1)-N(1) | 88.26(5)   | N(2)-Al(1)-N(1) | 79.06(5)   |

---

**Table S2** Selected bond lengths (Å) and angles (deg) for (<sup>t</sup>-Bu,BrBPBA)Al(O-*i*-Pr)•1/2(C<sub>7</sub>H<sub>8</sub>) (**3c** • 1/2 C<sub>7</sub>H<sub>8</sub>)

---

|                 |            |                 |            |
|-----------------|------------|-----------------|------------|
| Al(1)-O(1)      | 1.7408(19) | Al(1)-O(2)      | 1.7642(19) |
| Al(1)-O(3)      | 1.7806(19) | Al(1)-N(1)      | 2.153(2)   |
| Al(1)-N(2)      | 2.099(2)   |                 |            |
| O(1)-Al(1)-O(2) | 99.77(9)   | O(1)-Al(1)-O(3) | 98.13(9)   |
| O(2)-Al(1)-O(3) | 119.15(9)  | O(1)-Al(1)-N(2) | 85.89(9)   |
| O(3)-Al(1)-N(2) | 127.88(9)  | O(2)-Al(1)-N(2) | 111.08(9)  |
| O(1)-Al(1)-N(1) | 164.74(9)  | O(3)-Al(1)-N(1) | 88.27(8)   |
| O(2)-Al(1)-N(1) | 89.00(8)   | N(2)-Al(1)-N(1) | 79.28(9)   |

---
